# Supplementary material
Source: Elsevier journal article supplement (https://authors.library.caltech.edu/36785/9/mmc6.xlsx)
Supplement: mmc6 [file mmc6.xlsx]

## Sheet: Sheet1
CuOx									ref a	0.0001
	3e-10	3.19778e-06	0.00116552	0.00570435	0.0485904	0.8	2.23		Do	10000
	0.00650195	0.168367	1.11922	1.16661	0.470822	2.70965	2.56988		Ea/R	18922
																					Cum
																Ox	D	C	A	B	Ox	D	C	A	B	Agg
													0.000957963	3e-10	-5.52288	0.000791864	0.00118625	4.45994e-05	0.00270461	6.24948e-05	0.000791864	0.00118625	4.45994e-05	0.00270461	6.24948e-05	0.000957963
logd/a2	23.0429	14.9903	9.86696	8.48759	6.6269	4.19382	3.30339						0.0259936	3.19778e-06	-1.49515	0.0205049	0.0231375	0.0302844	0.0262748	0.0297664	0.0212968	0.0243238	0.030329	0.0289794	0.0298289	0.0269516
	1.10374e+23	9.77916e+14	7.36135e+09	3.07318e+08	4.23545e+06	15625	2010.91						0.117738	0.00116552	1.06652	0.136307	0.0956538	0.123645	0.0921392	0.140944	0.157604	0.119978	0.153974	0.121119	0.170773	0.144689
													0.152396	0.00570435	1.75621	0.142078	0.222016	0.119694	0.16697	0.111223	0.299682	0.341994	0.273668	0.288089	0.281996	0.297086
													0.0746043	0.0485904	2.68655	0.05734	0.0606192	0.0755641	0.0519113	0.127587	0.357022	0.402613	0.349232	0.34	0.409583	0.37169
Tcs	-54.8422	2.56176	57.5596	76.2465	104.995	150.377	169.757						0.303868	0.8	3.90309	0.329999	0.28833	0.313596	0.33	0.257417	0.687022	0.690943	0.662827	0.67	0.667	0.675559
	1	2	3	4	5	6	7						0.324441	2.23	4.3483	0.312978	0.309056	0.337173	0.33	0.333	1	1	1	1	1	1
	Individual Domains
	3.01e-10	3.19779e-06	0.00116552	0.00570435	0.0485904	0.8	2.23
	0.00650205	0.168367	1.11922	1.16661	0.470822	2.70965	2.56988
	0.000791864	0.0205049	0.136307	0.142078	0.05734	0.329999	0.312978
D	3e-10	3.19778e-06	0.00116552	0.00570435	0.0485904	0.8	2.23
	0.0105916	0.206589	0.854067	1.98232	0.541252	2.57442	2.75948
	21.7721	14.99	9.86696	8.48759	6.6269	4.19382	3.30339
	5.91716e+21	9.77305e+14	7.36134e+09	3.07318e+08	4.23545e+06	15625	2010.91
	1	0.998814	0.975676	0.880022	0.658006	0.597387	0.309056
Tcs	-47.4078	2.56419	57.5596	76.2465	104.995	150.377	169.757
	0	1	2	3	4	5	6
	Individual Domains
	1.3e-09	3.19878e-06	0.00116552	0.00570435	0.0485904	0.8	2.23
	0.0105917	0.206589	0.854067	1.98232	0.541252	2.57442	2.75948
	0.00118625	0.0231375	0.0956538	0.222016	0.0606192	0.28833	0.309056
C	3e-10	3.19778e-06	0.00116552	0.00570435	0.0485904	0.8	2.23
	0.000339876	0.230854	0.942532	0.912412	0.576016	2.3905	2.57023
	21.7721	14.99	9.86696	8.48759	6.6269	4.19382	3.30339
	5.91716e+21	9.77305e+14	7.36134e+09	3.07318e+08	4.23545e+06	15625	2010.91
	1	0.999955	0.969671	0.846026	0.726332	0.650768	0.337173
Tcs	-47.4078	2.56419	57.5596	76.2465	105.424	167.372	283.568
	0	1	2	3	4	5	6
	Individual Domains
	1.3e-09	3.19878e-06	0.00116552	0.00570435	0.0485904	0.8	2.23
	0.000339976	0.230854	0.942532	0.912412	0.576016	2.3905	2.57023
	4.45994e-05	0.0302844	0.123645	0.119694	0.0755641	0.313596	0.337173
A	3e-10	3.19778e-06	0.00116552	0.00570435	0.0485904	0.8	2.23
	0.0366017	0.35558	1.24693	2.25963	0.702523	4.46593	4.46593
	21.7721	14.99	9.86696	8.48759	6.6269	4.19382	3.30339
	5.91716e+21	9.77305e+14	7.36134e+09	3.07318e+08	4.23545e+06	15625	2010.91
	1	0.997295	0.971021	0.878881	0.711911	0.66	0.33
Tcs	-47.4078	2.56419	57.5596	76.2465	104.995	150.377	169.757
	0	1	2	3	4	5	6
	Individual Domains
	1.3e-09	3.19878e-06	0.00116552	0.00570435	0.0485904	0.8	2.23
	0.0366018	0.35558	1.24693	2.25963	0.702523	4.46593	4.46593
	0.00270461	0.0262748	0.0921392	0.16697	0.0519113	0.33	0.33
B	3e-10	3.19778e-06	0.00116552	0.00570435	0.0485904	0.8	2.23
	0.000629895	0.30002	1.4206	1.12103	1.28597	2.59455	3.35636
logd/a2	23.0429	14.9903	9.86696	8.48759	6.6269	4.19382	3.30339
	1.10374e+23	9.77916e+14	7.36135e+09	3.07318e+08	4.23545e+06	15625	2010.91
							0.333
Tcs	-54.8422	2.56176	57.5596	76.2465	104.995	150.377	169.757
	1	2	3	4	5	6	7
	Individual Domains
	3.01e-10	3.19779e-06	0.00116552	0.00570435	0.0485904	0.8	2.23
	0.000629895	0.30002	1.4206	1.12103	1.28597	2.59455	3.35636
	6.24948e-05	0.0297664	0.140944	0.111223	0.127587	0.257417	0.333
Table A3 Best Fitting Domain Spectrum
		Domain Number
Average	1	2	3	4	5	6	7
Relative Radius	3.01e-10	3.19779e-06	0.00116552	0.00570435	0.0485904	0.8	2.23
Volukme Fraction	0.000957963	0.0259936	0.117738	0.152396	0.0746043	0.303868	0.324441
ln(Do/a2)	23.0429	14.9903	9.86696	8.48759	6.6269	4.19382	3.30339

## Sheet: Sheet2
	10^4/T		log(r/ro)
	#REF!	#REF!	#DIV/0!	#DIV/0!	#DIV/0!
	#REF!	#REF!	#DIV/0!	#DIV/0!	#DIV/0!
	#REF!	#REF!	#DIV/0!	#DIV/0!	#DIV/0!
	#REF!	#REF!	#DIV/0!	#DIV/0!	#DIV/0!
	#REF!	#REF!	#DIV/0!	#DIV/0!	#DIV/0!
	#REF!	#REF!	#DIV/0!	#DIV/0!	#DIV/0!
	#REF!	#REF!	#DIV/0!	#DIV/0!	#DIV/0!
	#REF!	#REF!	#DIV/0!	#DIV/0!	#DIV/0!
	#REF!	#REF!	#DIV/0!	#DIV/0!	#DIV/0!
	#REF!	#REF!	#DIV/0!	#DIV/0!	#DIV/0!
	#REF!	#REF!	#DIV/0!	#DIV/0!	#DIV/0!
	#REF!	#REF!	#DIV/0!	#DIV/0!	#DIV/0!
	#REF!	#REF!	#DIV/0!	#DIV/0!	#DIV/0!
	#REF!	#REF!	#DIV/0!	#DIV/0!	#DIV/0!
	#REF!	#REF!	#DIV/0!	#DIV/0!	#DIV/0!
	#REF!	#REF!	#DIV/0!	#DIV/0!	#DIV/0!
	#REF!	#REF!	#DIV/0!	#DIV/0!	#DIV/0!
	#REF!	#REF!	#DIV/0!	#DIV/0!	#DIV/0!
	#REF!	#REF!	#DIV/0!	#DIV/0!	#DIV/0!
	#REF!	#REF!	#DIV/0!	#DIV/0!	#DIV/0!
	#REF!	#REF!	#DIV/0!	#DIV/0!	#DIV/0!
	#REF!	#REF!	#DIV/0!	#DIV/0!	#DIV/0!
	#REF!	#REF!	#DIV/0!	#DIV/0!	#DIV/0!
	#REF!	#REF!	#DIV/0!	#DIV/0!	#DIV/0!
	#REF!	#REF!	#DIV/0!	#DIV/0!	#DIV/0!
	#REF!	#REF!	#DIV/0!	#DIV/0!	#DIV/0!
	#REF!	#REF!	#DIV/0!	#DIV/0!	#DIV/0!
	#REF!	#REF!	#DIV/0!	#DIV/0!	#DIV/0!
	#REF!	#REF!	#DIV/0!	#DIV/0!	#DIV/0!
	#REF!	#REF!	#DIV/0!	#DIV/0!	#DIV/0!
	#REF!	#REF!	#DIV/0!	#DIV/0!	#DIV/0!
	#REF!	#REF!	#DIV/0!	#DIV/0!	#DIV/0!
	#REF!	#REF!	#DIV/0!	#DIV/0!	#DIV/0!
	#REF!	#REF!	#DIV/0!	#DIV/0!	#DIV/0!
	#REF!	#REF!	#DIV/0!	#DIV/0!	#DIV/0!
	#REF!	#REF!	#DIV/0!	#DIV/0!	#DIV/0!
	#REF!	#REF!	#DIV/0!	#DIV/0!	#DIV/0!
	#REF!	#REF!	#DIV/0!	#DIV/0!	#DIV/0!

## Sheet: Sheet3
Supplementary Table A3 - Domain Size Spectra
Aliquot		D			A			A			A
Ea (kJ/mol)		157			157			151			163
	Domain #	Domain Size	Fraction	Tc (oC)	Domain Size	Fraction	Tc (oC)	Domain Size	Fraction	Tc (oC)	Domain Size	Fraction	Tc (oC)
	1	1.3e-09	0.006	-47	1.59e-06	0.018	-3
	2	8.44e-06	0.021	10	0.000122	0.013	34	8.69e-06	0.036	0	1.19e-06	0.039	6
	3	0.00153	0.127	61	0.00139	0.085	59	0.00393	0.147	58	0.00104	0.175	69
	4	0.00632	0.189	78	0.00333	0.108	70	0.0123	0.066	72	0.00718	0.11	93
	5	0.0487	0.054	105	0.0136	0.094	87	0.0281	0.071	83	0.353	0.181	152
	6	0.588	0.252	145	0.972	0.363	154	1.73	0.393	148	1.47	0.329	179
	7	2.3	0.35	170	4.33	0.318	183	8.78	0.288	180	8.32	0.166	216
Tc is closure temperature assuming cooling rate of 10 C/Ma
Domain sizes are relative only (unitless)

## Sheet: Sheet4
1.3e-09	0.006	-47	1.59e-06	0.018	-3											0.018	-3		0	0		0	0
8.44e-06	0.021	10	0.000122	0.013	34	8.69e-06	0.036	0	1.19e-06	0.039	6					0.031	34		0.036	0		0.039	6
0.00153	0.127	61	0.00139	0.085	59	0.00393	0.147	58	0.00104	0.175	69					0.116	59		0.183	58		0.214	69
0.00632	0.189	78	0.00333	0.108	70	0.0123	0.066	72	0.00718	0.11	93					0.224	70		0.249	72		0.324	93
0.0487	0.054	105	0.0136	0.094	87	0.0281	0.071	83	0.353	0.181	152					0.318	87		0.32	83		0.505	152
0.588	0.252	145	0.972	0.363	154	1.73	0.393	148	1.47	0.329	179					0.681	154		0.713	148		0.834	179
2.3	0.35	170	4.33	0.318	183	8.78	0.288	180	8.32	0.166	216					0.999	183		1.001	180		1	216
